# Supplementary material for: Comparison of genomic signatures of selection on Plasmodium falciparum between different regions of a country with high malaria endemicity
Source: PubMed Central journal article supplement (PMC4502944; doi:10.1186/s12864-015-1746-3), 2015-07-16

## Supplementary Figures

**Supplementary Figure S1.** Allele frequency distributions of SNPs within genes in each of the two local *P. falciparum* population samples in Ghana. Kintampo population (N = 45), with gene indices plotted according to order in the genome. B. Navrongo population (N = 40), with indices similarly plotted.

**Supplementary Figure S2.** Principal Component Analysis of genome-wide SNP data (107547 SNPs with no missing data for any of these isolates) shows no difference between *P. falciparum* clinical isolates from the two local populations. Red points show isolates from Kintampo (N = 45) and blue points show isolates from Navrongo (N = 40). The first three principal components respectively account for 1.90%, 1.85%, and 1.83% of the total observed variation among isolates.

Supplementary Figure S1

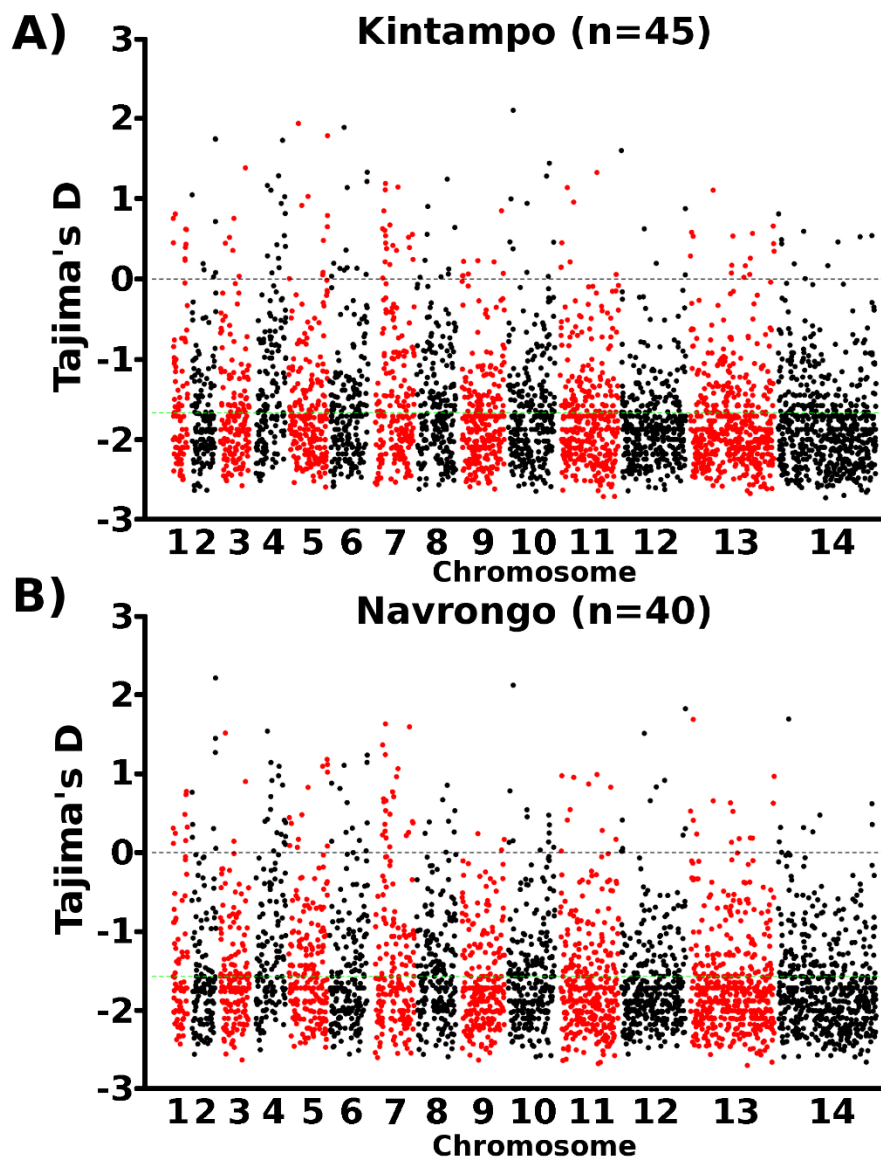

Supplementary Figure S2

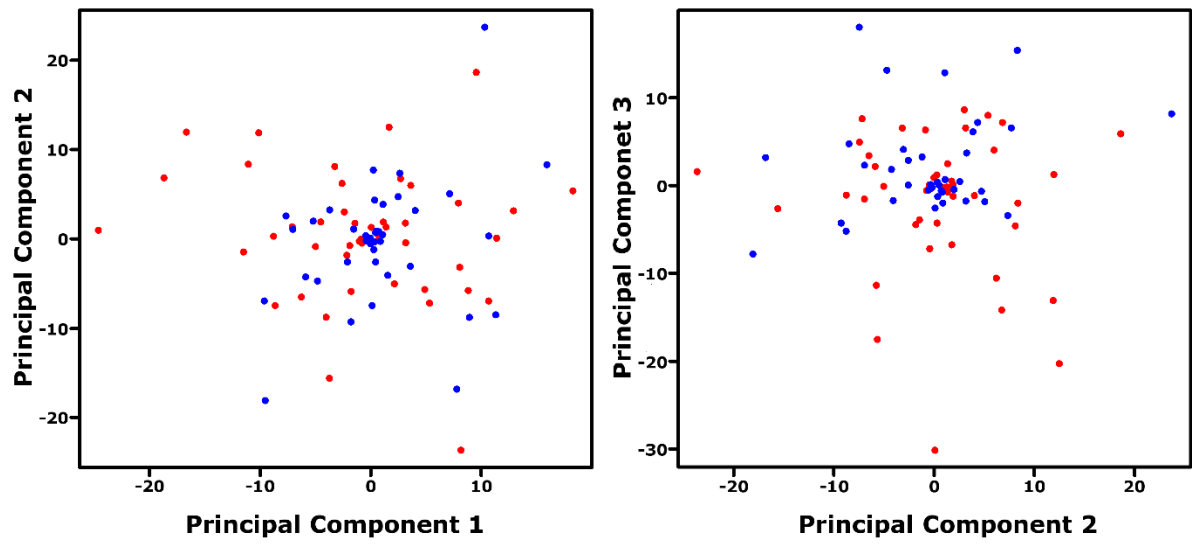

Supplement: 12864_2015_1746_MOESM2_ESM.pdf [file 12864_2015_1746_MOESM2_ESM.pdf]
